# Supplementary material for: Cancer in Migrants: A Population-Based Study in Italy
Source: MDPI journal article supplement (doi:10.3390/cancers15123103), 2023-06-08
Supplement: s1 [file s1]

Supplementary materials.

Supplementary Table S1. Odds ratio of selected neoplasms among migrants, by region of origin.

| Males         |       |             |             |           | Females       |       |             |             |           | Total population |       |             |             |           |
|---------------|-------|-------------|-------------|-----------|---------------|-------|-------------|-------------|-----------|------------------|-------|-------------|-------------|-----------|
| Cancer        | Total | Sum         | PMR         | Interval  | Cancer        | Total | Sum         | PMR         | Interval  | Cancer           | Total | Sum         | PMR         | Interval  |
| Head and neck | 55    | 49,18618323 | 1,118200201 | 0,85-1,45 | Head and neck | 26    | 23,50145131 | 1,106314655 | 0,74-1,60 | Head and neck    | 81    | 72,68763454 | 1,114357353 | 0,89-1,38 |
| Colorectum    | 144   | 162,1714855 | 0,887948948 | 0,73-1,02 | Colorectum    | 217   | 235,1204    | 0,9229314   | 0,81-1,05 | Colorectum       | 361   | 397,2918855 | 0,908651833 | 0,82-1,01 |
| Lymphoma      | 87    | 89,65916893 | 0,970341361 | 0,78-1,19 | Lymphoma      | 95    | 111,2716242 | 0,853766634 | 0,69-1,04 | Lymphoma         | 182   | 200,9307931 | 0,90578451  | 0,78-1,05 |
| Leukemia      | 76    | 77,71586429 | 0,977921312 | 0,78-1,22 | Leukemia      | 79    | 102,738387  | 0,768943355 | 0,61-0,95 | Leukemia         | 155   | 180,4542513 | 0,858943466 | 0,73-1,01 |
| Sarcoma       | 26    | 22,33324785 | 1,164183561 | 0,78-1,68 | Sarcoma       | 24    | 23,20185591 | 1,034400011 | 0,68-1,52 | Sarcoma          | 50    | 45,53510376 | 1,098053938 | 0,82-1,44 |
| Stomach       | 46    | 45,80853641 | 1,004179649 | 0,74-1,33 | Cervix        | 165   | 61,84508904 | 2,667956382 | 2,28-3,10 | Cervix           | 165   | 61,84508904 | 2,667956382 | 2,28-3,10 |
| Lung          | 194   | 174,4042878 | 1,112357973 | 0,96-1,28 | Stomach       | 48    | 49,40054656 | 0,971649169 | 0,72-1,28 | Stomach          | 94    | 95,20908297 | 0,98730076  | 0,80-1,20 |
| Prostate      | 165   | 177,9897362 | 0,927019746 | 0,79-1,08 | Lung          | 137   | 104,2700176 | 1,313896393 | 1,11-1,55 | Lung             | 331   | 278,6743054 | 1,187766484 | 1,07-1,32 |
| Bladder       | 173   | 163,0024609 | 1,06133367  | 0,91-1,23 | Breast        | 790   | 847,7103435 | 0,931922096 | 0,87-1,00 | Breast           | 790   | 847,7103435 | 0,931922096 | 0,87-1,00 |
| Liver         | 44    | 44,3858448  | 0,99130703  | 0,73-1,32 | Bladder       | 65    | 61,42549793 | 1,05819248  | 0,82-1,34 | Prostate         | 165   | 177,9897362 | 0,927019746 | 0,79-1,08 |
|               |       |             |             |           | Liver         | 37    | 29,82446829 | 1,240592108 | 0,89-1,69 | Bladder          | 238   | 224,4279588 | 1,060473932 | 0,93-1,20 |
|               |       |             |             |           |               |       |             |             |           | Liver            | 81    | 74,21031309 | 1,091492498 | 0,87-1,35 |
| 1: EU, W/N    |       |             |             |           |               |       |             |             |           |                  |       |             |             |           |
| Europe        |       |             |             |           |               |       |             |             |           |                  |       |             |             |           |
| Males         |       |             |             |           | Females       |       |             |             |           | Total population |       |             |             |           |
| Cancer        | Total | Sum         | PMR         | Interval  | Cancer        | Total | Sum         | PMR         | Interval  | Cancer           | Total | Sum         | PMR         | Interval  |
| Head and neck | 24    | 15,13572197 | 1,585652805 | 1,02-2,29 | Head and neck | 16    | 9,867722395 | 1,621448128 | 0,96-2,58 | Head and neck    | 40    | 25,00344437 | 1,599779591 | 1,16-2,16 |
| Colorectum    | 39    | 44,97069537 | 0,86723142  | 0,63-1,17 | Colorectum    | 88    | 95,48645348 | 0,921596696 | 0,74-1,13 | Colorectum       | 127   | 140,4571489 | 0,90419036  | 0,76-1,07 |
| Lymphoma      | 29    | 31,29087908 | 0,926787641 | 0,63-1,31 | Lymphoma      | 40    | 49,74481328 | 0,804103933 | 0,58-1,10 | Lymphoma         | 69    | 81,03569236 | 0,851476652 | 0,67-1,07 |
| Leukemia      | 14    | 23,76816833 | 0,589023092 | 0,34-0,96 | Leukemia      | 32    | 43,805515   | 0,730501627 | 0,51-1,02 | Leukemia         | 46    | 67,57368333 | 0,680738384 | 0,50-0,90 |
| Sarcoma       | 10    | 7,721128621 | 1,295147444 | 0,66-2,31 | Sarcoma       | 5     | 10,47446831 | 0,477351198 | 0,18-1,06 | Sarcoma          | 15    | 18,19559693 | 0,824375263 | 0,48-1,33 |

|          |    |             |             |           |
|----------|----|-------------|-------------|-----------|
| Stomach  | 14 | 13,03871631 | 1,073725332 | 0,61-1,76 |
| Lung     | 61 | 45,95347537 | 1,327429525 | 1,02-1,70 |
| Prostate | 48 | 42,23063058 | 1,136615754 | 0,85-1,49 |
| Bladder  | 48 | 44,56092431 | 1,077176938 | 0,80-1,42 |
| Liver    | 10 | 12,19647187 | 0,819909241 | 0,42-1,46 |

|         |     |             |             |           |
|---------|-----|-------------|-------------|-----------|
| Cervix  | 69  | 28,14212781 | 2,45184019  | 1,92-3,09 |
| Stomach | 16  | 21,87425932 | 0,731453338 | 0,43-1,16 |
| Lung    | 61  | 43,09396023 | 1,415511586 | 1,09-1,81 |
| Breast  | 338 | 371,8830734 | 0,908887831 | 0,82-1,01 |
| Bladder | 40  | 25,14782838 | 1,590594599 | 1,15-2,15 |
| Liver   | 16  | 11,68969456 | 1,368726952 | 0,81-2,18 |

|          |     |             |             |           |
|----------|-----|-------------|-------------|-----------|
| Cervix   | 69  | 28,14212781 | 2,45184019  | 1,92-3,09 |
| Stomach  | 30  | 34,91297563 | 0,859279378 | 0,59-1,21 |
| Lung     | 122 | 89,0474356  | 1,370056298 | 1,14-1,63 |
| Breast   | 338 | 371,8830734 | 0,908887831 | 0,82-1,01 |
| Prostate | 48  | 42,23063058 | 1,136615754 | 0,85-1,49 |
| Bladder  | 88  | 69,7087527  | 1,262395275 | 1,01-1,54 |
| Liver    | 26  | 23,88616643 | 1,088496142 | 0,72-1,57 |

**2: Balkans, E**  
**Europe**  
**Males**

| Cancer        | Total | Sum         | PMR         | Interval  |
|---------------|-------|-------------|-------------|-----------|
| Head and neck | 14    | 6,101710413 | 2,294438617 | 1,31-3,76 |
| Colorectum    | 15    | 15,84232624 | 0,946830647 | 0,55-1,53 |
| Lymphoma      | 8     | 11,11022022 | 0,720057735 | 0,33-1,37 |
| Leukemia      | 10    | 8,650346084 | 1,156023112 | 0,59-2,06 |
| Sarcoma       | 5     | 2,567230426 | 1,94762416  | 0,71-4,31 |
| Stomach       | 8     | 4,581265146 | 1,746242521 | 0,81-3,32 |
| Lung          | 19    | 16,58451771 | 1,145646821 | 0,71-1,76 |
| Prostate      | 5     | 14,05598444 | 0,355720371 | 0,13-0,79 |
| Bladder       | 16    | 15,93038773 | 1,004369779 | 0,59-1,60 |
| Liver         | 3     | 4,601574281 | 0,651950793 | 0,17-1,78 |

**Females**

| Cancer        | Total | Sum         | PMR         | Interval  |
|---------------|-------|-------------|-------------|-----------|
| Head and neck | 1     | 4,817153087 | 0,207591493 | 0,01-1,02 |
| Colorectum    | 38    | 41,72590834 | 0,910705159 | 0,65-1,24 |
| Lymphoma      | 19    | 24,68003489 | 0,769853045 | 0,48-1,18 |
| Leukemia      | 11    | 19,39529825 | 0,567147762 | 0,30-0,99 |
| Sarcoma       | 7     | 5,058936638 | 1,383689993 | 0,61-2,74 |
| Cervix        | 75    | 14,3258459  | 5,235292946 | 4,15-6,52 |
| Stomach       | 10    | 9,522280302 | 1,050168624 | 0,53-1,87 |
| Lung          | 31    | 20,67209975 | 1,499605767 | 1,04-2,10 |
| Breast        | 153   | 185,8553885 | 0,823220684 | 0,70-0,96 |
| Bladder       | 12    | 11,37786674 | 1,054679253 | 0,57-1,79 |
| Liver         | 4     | 4,193927317 | 0,953759972 | 0,30-2,30 |

**Total population**

| Cancer        | Total | Sum         | PMR         | Interval  |
|---------------|-------|-------------|-------------|-----------|
| Head and neck | 15    | 10,9188635  | 1,373769349 | 0,80-2,22 |
| Colorectum    | 53    | 57,56823458 | 0,92064661  | 0,70-1,20 |
| Lymphoma      | 27    | 35,79025511 | 0,754395293 | 0,51-1,08 |
| Leukemia      | 21    | 28,04564433 | 0,748779374 | 0,48-1,13 |
| Sarcoma       | 12    | 7,626167064 | 1,573529651 | 0,85-2,67 |
| Cervix        | 75    | 14,3258459  | 5,235292946 | 4,15-6,53 |
| Stomach       | 18    | 14,10354545 | 1,276274825 | 1,78-1,98 |
| Lung          | 50    | 37,25661746 | 1,342043465 | 1,01-1,76 |
| Breast        | 153   | 185,8553885 | 0,823220684 | 0,70-0,96 |
| Prostate      | 5     | 14,05598444 | 0,355720371 | 0,13-0,79 |
| Bladder       | 28    | 27,30825447 | 1,025331005 | 0,69-1,46 |
| Liver         | 7     | 8,795501598 | 0,795861376 | 0,34-1,57 |

**3: N Africa**  
**Males**

| Cancer        | Total | Sum         | PMR         | Interval  |
|---------------|-------|-------------|-------------|-----------|
| Head and neck | 8     | 13,56498658 | 0,589753624 | 0,27-1,12 |
| Colorectum    | 56    | 57,17744353 | 0,979407202 | 0,75-1,26 |
| Lymphoma      | 20    | 17,18286418 | 1,163950305 | 0,73-1,77 |

**Females**

| Cancer        | Total | Sum         | PMR         | Interval  |
|---------------|-------|-------------|-------------|-----------|
| Head and neck | 4     | 3,176341232 | 1,259310542 | 0,40-3,03 |
| Colorectum    | 40    | 39,86032755 | 1,003504047 | 0,73-1,35 |
| Lymphoma      | 15    | 12,3365479  | 1,215899303 | 0,71-1,96 |

**Total population**

| Cancer        | Total | Sum         | PMR         | Interval  |
|---------------|-------|-------------|-------------|-----------|
| Head and neck | 12    | 16,74132781 | 0,716789023 | 0,38-1,21 |
| Colorectum    | 96    | 97,03777108 | 0,989305493 | 0,80-1,20 |
| Lymphoma      | 35    | 29,51941209 | 1,18566047  | 0,83-1,63 |

|          |    |             |             |           |
|----------|----|-------------|-------------|-----------|
| Leukemia | 16 | 20,36748897 | 0,785565664 | 0,47-1,25 |
| Sarcoma  | 4  | 3,99115466  | 1,002216236 | 0,32-2,42 |
| Stomach  | 14 | 15,50246411 | 0,903082239 | 0,51-1,48 |
| Lung     | 72 | 66,98519277 | 1,074864414 | 0,85-1,35 |
| Prostate | 71 | 79,74873435 | 0,890296261 | 0,70-1,12 |
| Bladder  | 76 | 58,44186943 | 1,300437524 | 1,03-1,62 |
| Liver    | 14 | 15,55979903 | 0,899754552 | 0,51-1,47 |

|          |    |             |             |           |
|----------|----|-------------|-------------|-----------|
| Leukemia | 11 | 15,12310696 | 0,727363764 | 0,38-1,27 |
| Sarcoma  | 5  | 2,461425955 | 2,031342844 | 0,74-4,51 |
| Cervix   | 6  | 5,47746609  | 1,095397014 | 0,44-2,28 |
| Stomach  | 11 | 8,601474074 | 1,278850567 | 0,67-2,22 |
| Lung     | 14 | 15,37922864 | 0,910318738 | 0,52-1,49 |
| Breast   | 87 | 91,76830702 | 0,948039719 | 0,76-1,16 |
| Bladder  | 7  | 9,805385505 | 0,7138934   | 0,31-1,41 |
| Liver    | 9  | 6,428953171 | 1,39991687  | 0,68-2,57 |

|          |    |             |             |           |
|----------|----|-------------|-------------|-----------|
| Leukemia | 27 | 35,49059593 | 0,760764909 | 0,51-1,09 |
| Sarcoma  | 9  | 6,452580615 | 1,394790788 | 0,68-2,56 |
| Cervix   | 6  | 5,47746609  | 1,095397014 | 0,44-2,28 |
| Stomach  | 25 | 24,10393819 | 1,037174913 | 0,68-1,50 |
| Lung     | 86 | 82,36442141 | 1,044140158 | 0,84-1,28 |
| Breast   | 87 | 91,76830702 | 0,948039719 | 0,76-1,16 |
| Prostate | 71 | 79,74873435 | 0,890296261 | 0,70-1,12 |
| Bladder  | 83 | 68,24725493 | 1,216166131 | 0,95-1,50 |
| Liver    | 23 | 21,9887522  | 1,045989322 | 0,67-1,54 |

#### 4: Sub-Saharan

##### Africa

##### Males

| Cancer        | Total | Sum         | PMR         | Interval  |
|---------------|-------|-------------|-------------|-----------|
| Head and neck | 1     | 3,461293003 | 0,288909375 | 0,01-1,42 |
| Colorectum    | 3     | 10,50696258 | 0,285524953 | 0,07-0,77 |
| Lymphoma      | 10    | 9,826771394 | 1,017628232 | 0,51-1,81 |
| Leukemia      | 10    | 7,116181784 | 1,405247969 | 0,70-2,50 |
| Sarcoma       | 3     | 2,760605181 | 1,086718239 | 0,27-2,95 |
| Stomach       | 3     | 2,931510588 | 1,023363181 | 0,26-2,78 |
| Lung          | 11    | 11,1012098  | 0,990882994 | 0,52-1,73 |
| Prostate      | 11    | 11,48130465 | 0,958079272 | 0,50-1,66 |
| Bladder       | 7     | 10,61336637 | 0,659545686 | 0,29-1,34 |
| Liver         | 8     | 2,911504508 | 2,747720286 | 1,27-5,22 |

##### Females

| Cancer        | Total | Sum         | PMR         | Interval   |
|---------------|-------|-------------|-------------|------------|
| Head and neck | 0     | 1,096242728 | 0           | 0,00-2,74  |
| Colorectum    | 4     | 11,63694736 | 0,343732757 | 0,11-0,82  |
| Lymphoma      | 5     | 4,852965723 | 1,030297819 | 0,37-2,28  |
| Leukemia      | 4     | 4,571460157 | 0,874993954 | 0,27-2,11  |
| Sarcoma       | 1     | 0,962466966 | 1,038996698 | 0,05-5,13  |
| Cervix        | 2     | 2,448204882 | 0,816925093 | 0,13-2,70  |
| Stomach       | 2     | 0,332235645 | 6,01982368  | 1,01-20,02 |
| Lung          | 8     | 5,017138812 | 1,594534315 | 0,74-3,03  |
| Breast        | 45    | 36,33197181 | 1,238578524 | 0,91-1,64  |
| Bladder       | 2     | 3,005293211 | 0,665492469 | 0,11-2,19  |
| Liver         | 0     | 1,606729382 | 0           | 0,00-1,87  |

##### Total population

| Cancer        | Total | Sum         | PMR         | Interval  |
|---------------|-------|-------------|-------------|-----------|
| Head and neck | 1     | 4,557535731 | 0,219416821 | 0,01-1,08 |
| Colorectum    | 7     | 22,14390994 | 0,316114002 | 0,13-0,62 |
| Lymphoma      | 15    | 14,67973712 | 1,021816663 | 0,59-1,64 |
| Leukemia      | 14    | 11,68764194 | 1,197846415 | 0,68-1,96 |
| Sarcoma       | 4     | 3,723072147 | 1,074381543 | 0,34-2,59 |
| Cervix        | 2     | 2,448204882 | 0,816925093 | 0,13-2,70 |
| Stomach       | 5     | 3,263746233 | 1,531981852 | 0,56-3,4  |
| Lung          | 19    | 16,11834861 | 1,178780808 | 0,73-1,80 |
| Breast        | 45    | 36,33197181 | 1,238578524 | 0,91-1,64 |
| Prostate      | 11    | 11,48130465 | 0,958079272 | 0,50-1,66 |
| Bladder       | 9     | 13,61865958 | 0,66085799  | 0,32-1,21 |
| Liver         | 8     | 4,51823389  | 1,770603336 | 0,82-3,36 |

#### 5: W Asia

##### Males

| Cancer        | Total | Sum         | PMR | Interval   |
|---------------|-------|-------------|-----|------------|
| Head and neck | 0     | 0,277639035 | 0   | 0,00-11,09 |

##### Females

| Cancer        | Total | Sum         | PMR | Interval   |
|---------------|-------|-------------|-----|------------|
| Head and neck | 0     | 0,081299107 | 0   | 0,00-37,44 |

##### Total population

| Cancer        | Total | Sum         | PMR | Interval  |
|---------------|-------|-------------|-----|-----------|
| Head and neck | 0     | 0,358938142 | 0   | 0,00-8,55 |

|            |   |             |             |            |
|------------|---|-------------|-------------|------------|
| Colorectum | 1 | 1,368275913 | 0,730846747 | 0,03-3,62  |
| Lymphoma   | 0 | 0,391307027 | 0           | 0,00-7,68  |
| Leukemia   | 2 | 1,244136225 | 1,607541007 | 0,27-5,32  |
| Sarcoma    | 0 | 0,2809417   | 0           | 0,00-10,69 |
| Stomach    | 0 | 0,366110131 | 0           | 0,00-8,32  |
| Lung       | 0 | 1,597317481 | 0           | 0,00-1,88  |
| Prostate   | 3 | 1,845404079 | 1,625660219 | 0,41-4,43  |
| Bladder    | 3 | 1,406064716 | 2,133614453 | 0,54-5,83  |
| Liver      | 0 | 0,426944105 | 0           | 0,00-7,13  |

|            |   |             |             |            |
|------------|---|-------------|-------------|------------|
| Colorectum | 1 | 1,077070028 | 0,928444738 | 0,04-4,60  |
| Lymphoma   | 1 | 0,275375674 | 3,631402827 | 0,18-18,27 |
| Leukemia   | 0 | 0,373035601 | 0           | 0,00-8,09  |
| Sarcoma    | 0 | 0,05783321  | 0           | 0,00-59,91 |
| Cervix     | 0 | 0,132844153 | 0           | 0,00-23,04 |
| Stomach    | 0 | 0,24915299  | 0           | 0,00-12,48 |
| Lung       | 0 | 0,357303294 | 0           | 0,00-8,55  |
| Breast     | 1 | 2,181441    | 0,458412581 | 0,02-2,26  |
| Bladder    | 1 | 0,255279168 | 3,917280075 | 0,20-19,73 |
| Liver      | 0 | 0,183117355 | 0           | 0,00-16,64 |

|            |   |             |             |            |
|------------|---|-------------|-------------|------------|
| Colorectum | 2 | 2,44534594  | 0,817880189 | 0,13-2,70  |
| Lymphoma   | 1 | 0,666682701 | 1,499963923 | 0,07-7,47  |
| Leukemia   | 2 | 1,617171826 | 1,236726963 | 0,20-4,10  |
| Sarcoma    | 0 | 0,33877491  | 0           | 0,00-9,07  |
| Cervix     | 0 | 0,132844153 | 0           | 0,00-23,04 |
| Stomach    | 0 | 0,61526312  | 0           | 0,00-4,49  |
| Lung       | 0 | 1,954620775 | 0           | 0,00-1,53  |
| Breast     | 1 | 2,181441    | 0,458412581 | 0,02-2,26  |
| Prostate   | 3 | 1,845404079 | 1,625660219 | 0,41-4,43  |
| Bladder    | 4 | 1,661343885 | 2,407689363 | 0,76-5,81  |
| Liver      | 0 | 0,610061459 | 0           | 0,00-4,91  |

**6: Other Asia excl. Japan**

**Males**

| Cancer        | Total | Sum         | PMR         | Interval  |
|---------------|-------|-------------|-------------|-----------|
| Head and neck | 4     | 3,200070704 | 1,249972382 | 0,39-3,01 |
| Colorectum    | 8     | 8,040381494 | 0,994977664 | 0,46-1,88 |
| Lymphoma      | 2     | 5,86501063  | 0,34100535  | 0,05-1,12 |
| Leukemia      | 9     | 4,150605906 | 2,168358115 | 1,05-3,98 |
| Sarcoma       | 2     | 1,376639571 | 1,452813098 | 0,24-4,82 |
| Stomach       | 3     | 2,316398909 | 1,295113716 | 0,33-3,53 |
| Lung          | 11    | 8,379048929 | 1,312798158 | 0,69-2,28 |
| Prostate      | 4     | 7,250588799 | 0,551679334 | 0,17-1,33 |
| Bladder       | 2     | 8,011953801 | 0,249627001 | 0,04-0,82 |
| Liver         | 3     | 2,274502645 | 1,318969669 | 0,33-3,59 |

**Females**

| Cancer        | Total | Sum         | PMR         | Interval   |
|---------------|-------|-------------|-------------|------------|
| Head and neck | 1     | 0,897308078 | 1,114444441 | 0,05-5,54  |
| Colorectum    | 11    | 7,804464544 | 1,409449673 | 0,74-2,45  |
| Lymphoma      | 1     | 5,120319079 | 0,195300329 | 0,01-0,96  |
| Leukemia      | 9     | 4,835039151 | 1,861412022 | 0,90-3,41  |
| Sarcoma       | 2     | 1,144964892 | 1,746778451 | 0,29-5,79  |
| Cervix        | 4     | 2,881128173 | 1,388345037 | 0,44-3,35  |
| Stomach       | 3     | 0,145138369 | 20,66993045 | 5,45-58,32 |
| Lung          | 3     | 3,906349577 | 0,767980423 | 0,19-2,09  |
| Breast        | 34    | 37,71242185 | 0,901559707 | 0,63-1,24  |
| Bladder       | 0     | 2,103930352 | 0           | 0,00-1,42  |
| Liver         | 2     | 0,811858546 | 2,463483337 | 0,41-8,15  |

**Total population**

| Cancer        | Total | Sum         | PMR         | Interval  |
|---------------|-------|-------------|-------------|-----------|
| Head and neck | 5     | 4,097378782 | 1,220292354 | 0,44-2,71 |
| Colorectum    | 19    | 15,84484604 | 1,199128092 | 0,74-1,83 |
| Lymphoma      | 3     | 10,98532971 | 0,273091485 | 0,06-0,74 |
| Leukemia      | 18    | 8,985645057 | 2,003195083 | 1,22-3,10 |
| Sarcoma       | 4     | 2,521604463 | 1,586291609 | 0,50-3,82 |
| Cervix        | 4     | 2,881128173 | 1,388345037 | 0,44-3,35 |
| Stomach       | 6     | 2,461537279 | 2,437501171 | 0,98-5,07 |
| Lung          | 14    | 12,28539851 | 1,139564174 | 0,64-1,86 |
| Breast        | 34    | 37,71242185 | 0,901559707 | 0,63-1,24 |
| Prostate      | 4     | 7,250588799 | 0,551679334 | 0,17-1,33 |
| Bladder       | 2     | 10,11588415 | 0,197708868 | 0,03-0,65 |
| Liver         | 5     | 3,086361191 | 1,620030739 | 0,59-3,59 |

**7: N America, Oceania,  
Japan**

**Males**

**Females**

**Total population**

| Cancer        | Total | Sum         | PMR         | Interval  |
|---------------|-------|-------------|-------------|-----------|
| Head and neck | 2     | 2,785480391 | 0,718009004 | 0,12-2,37 |
| Colorectum    | 12    | 11,32186216 | 1,059896317 | 0,57-1,80 |
| Lymphoma      | 7     | 5,086830116 | 1,376102571 | 0,60-2,72 |
| Leukemia      | 6     | 5,778778853 | 1,038281643 | 0,42-2,16 |
| Sarcoma       | 0     | 1,50679939  | 0           | 0,00-1,99 |
| Stomach       | 2     | 3,374738889 | 0,592638443 | 0,09-1,96 |
| Lung          | 8     | 10,664202   | 0,750173337 | 0,34-1,42 |
| Prostate      | 11    | 10,18002072 | 1,080547899 | 0,56-1,87 |
| Bladder       | 13    | 11,19600148 | 1,161128821 | 0,64-1,93 |
| Liver         | 1     | 2,859016123 | 0,349770675 | 0,01-1,73 |

| Cancer        | Total | Sum         | PMR         | Interval  |
|---------------|-------|-------------|-------------|-----------|
| Head and neck | 4     | 1,416737154 | 2,823388931 | 0,90-6,84 |
| Colorectum    | 15    | 15,86579192 | 0,945430274 | 0,54-1,52 |
| Lymphoma      | 7     | 5,331856493 | 1,312863542 | 0,57-2,59 |
| Leukemia      | 7     | 6,042885246 | 1,158387048 | 0,50-2,29 |
| Sarcoma       | 0     | 1,202354989 | 0           | 0,00-2,49 |
| Cervix        | 2     | 3,295939611 | 0,606807234 | 0,10-2,01 |
| Stomach       | 2     | 3,739251687 | 0,534866376 | 0,08-1,77 |
| Lung          | 7     | 6,317601477 | 1,108015443 | 0,48-2,19 |
| Breast        | 46    | 48,31340571 | 0,952116691 | 0,70-1,25 |
| Bladder       | 0     | 4,071658387 | 0           | 0,00-0,73 |
| Liver         | 4     | 2,17688261  | 1,837489988 | 0,58-4,44 |

| Cancer        | Total | Sum         | PMR         |           |  |
|---------------|-------|-------------|-------------|-----------|--|
| Head and neck | 6     | 4,202217545 | 1,427817559 | 0,57-2,97 |  |
| Colorectum    | 27    | 27,18765408 | 0,99309782  | 0,66-1,42 |  |
| Lymphoma      | 14    | 10,41868661 | 1,343739429 | 0,76-2,20 |  |
| Leukemia      | 13    | 11,8216641  | 1,099675976 | 0,61-1,83 |  |
| Sarcoma       | 0     | 2,709154379 | 0           | 0,00-1,10 |  |
| Cervix        | 2     | 3,295939611 | 0,606807234 | 0,10-2,01 |  |
| Stomach       | 4     | 7,113990576 | 0,562272322 | 0,17-1,35 |  |
| Lung          | 15    | 16,98180347 | 0,88329841  | 0,51-1,42 |  |
| Breast        | 46    | 48,31340571 | 0,952116691 | 0,70-1,25 |  |
| Prostate      | 11    | 10,18002072 | 1,080547899 | 0,56-1,87 |  |
| Bladder       | 13    | 15,26765986 | 0,85147299  | 0,47-1,42 |  |
| Liver         | 5     | 5,035898733 | 0,992871435 | 0,36-2,20 |  |

## 8: Latin America

### Males

| Cancer        | Total | Sum         | PMR         | Interval  |
|---------------|-------|-------------|-------------|-----------|
| Head and neck | 2     | 4,659281135 | 0,429250767 | 0,07-1,42 |
| Colorectum    | 10    | 12,94353826 | 0,772586274 | 0,39-1,37 |
| Lymphoma      | 11    | 8,905286286 | 1,235221378 | 0,64-2,14 |
| Leukemia      | 9     | 6,64015814  | 1,355389406 | 0,66-2,48 |
| Sarcoma       | 2     | 2,128748301 | 0,939519247 | 0,15-3,11 |
| Stomach       | 2     | 3,697332323 | 0,540930548 | 0,09-1,79 |
| Lung          | 12    | 13,13932374 | 0,913289012 | 0,49-1,55 |
| Prostate      | 12    | 11,19706853 | 1,071709078 | 0,58-1,82 |
| Bladder       | 8     | 12,84189303 | 0,622961115 | 0,28-1,18 |
| Liver         | 5     | 3,556032235 | 1,406061495 | 0,51-3,12 |

### Females

| Cancer        | Total | Sum         | PMR         | Interval  |
|---------------|-------|-------------|-------------|-----------|
| Head and neck | 0     | 2,148647525 | 0           | 0,00-1,39 |
| Colorectum    | 20    | 21,66343677 | 0,923214549 | 0,57-1,40 |
| Lymphoma      | 7     | 8,929711108 | 0,78389994  | 0,34-1,55 |
| Leukemia      | 5     | 8,592046645 | 0,581933526 | 0,21-1,29 |
| Sarcoma       | 4     | 1,839404945 | 2,174616314 | 0,69-5,27 |
| Cervix        | 7     | 5,14153242  | 1,361461803 | 0,59-2,69 |
| Stomach       | 4     | 4,936754169 | 0,810248974 | 0,25-1,95 |
| Lung          | 13    | 9,526335844 | 1,364638011 | 0,75-2,27 |
| Breast        | 86    | 73,66433423 | 1,167457779 | 0,93-1,43 |
| Bladder       | 3     | 5,65825618  | 0,530198687 | 0,13-1,44 |
| Liver         | 2     | 2,733305356 | 0,731714807 | 0,12-2,42 |

### Total population

| Cancer        | Total | Sum         | PMR         | Interval  |
|---------------|-------|-------------|-------------|-----------|
| Head and neck | 2     | 6,80792866  | 0,293775111 | 0,04-0,97 |
| Colorectum    | 30    | 34,60697503 | 0,866877269 | 0,59-1,22 |
| Lymphoma      | 18    | 17,83499739 | 1,009251619 | 0,61-1,56 |
| Leukemia      | 14    | 15,23220478 | 0,91910529  | 0,52-1,50 |
| Sarcoma       | 6     | 3,968153245 | 1,512038379 | 0,61-3,15 |
| Cervix        | 7     | 5,14153242  | 1,361461803 | 0,59-2,69 |
| Stomach       | 6     | 8,634086492 | 0,694920071 | 0,28-1,44 |
| Lung          | 25    | 22,66565958 | 1,102990182 | 0,72-1,60 |
| Breast        | 86    | 73,66433423 | 1,167457779 | 0,93-1,43 |
| Prostate      | 12    | 11,19706853 | 1,071709078 | 0,58-1,82 |
| Bladder       | 11    | 18,50014921 | 0,594589799 | 0,31-1,03 |
| Liver         | 7     | 6,28937591  | 1,112994795 | 0,48-2,20 |
